# Supplementary material for: Clerodane Diterpenoids from an Edible Plant Justicia insularis: Discovery, Cytotoxicity, and Apoptosis Induction in Human Ovarian Cancer Cells
Source: MDPI journal article supplement (doi:10.3390/molecules26195933), 2021-09-30
Supplement: s1 [file s1]

## **Supplementary Materials**

### **Clerodane diterpenoids from an edible plant *Justicia insularis*: discovery, cytotoxicity, and apoptosis induction in human ovarian cancer cells**

Idowu E. Fadayomi<sup>1</sup>, Okiemute R. Johnson-Ajinwo<sup>1</sup>, Elisabete Pires<sup>2</sup>, James McCullagh<sup>2</sup>, Tim D. W.

Claridge<sup>2</sup>, Nicholas R. Forsyth<sup>1</sup>, and Wen-Wu Li<sup>1\*</sup>

<sup>1</sup>School of Pharmacy and Bioengineering, Keele University, Stoke on Trent, ST4 7QB, UK

<sup>2</sup>Department of Chemistry, University of Oxford, Mansfield Road, Oxford, OX1 3TA, UK

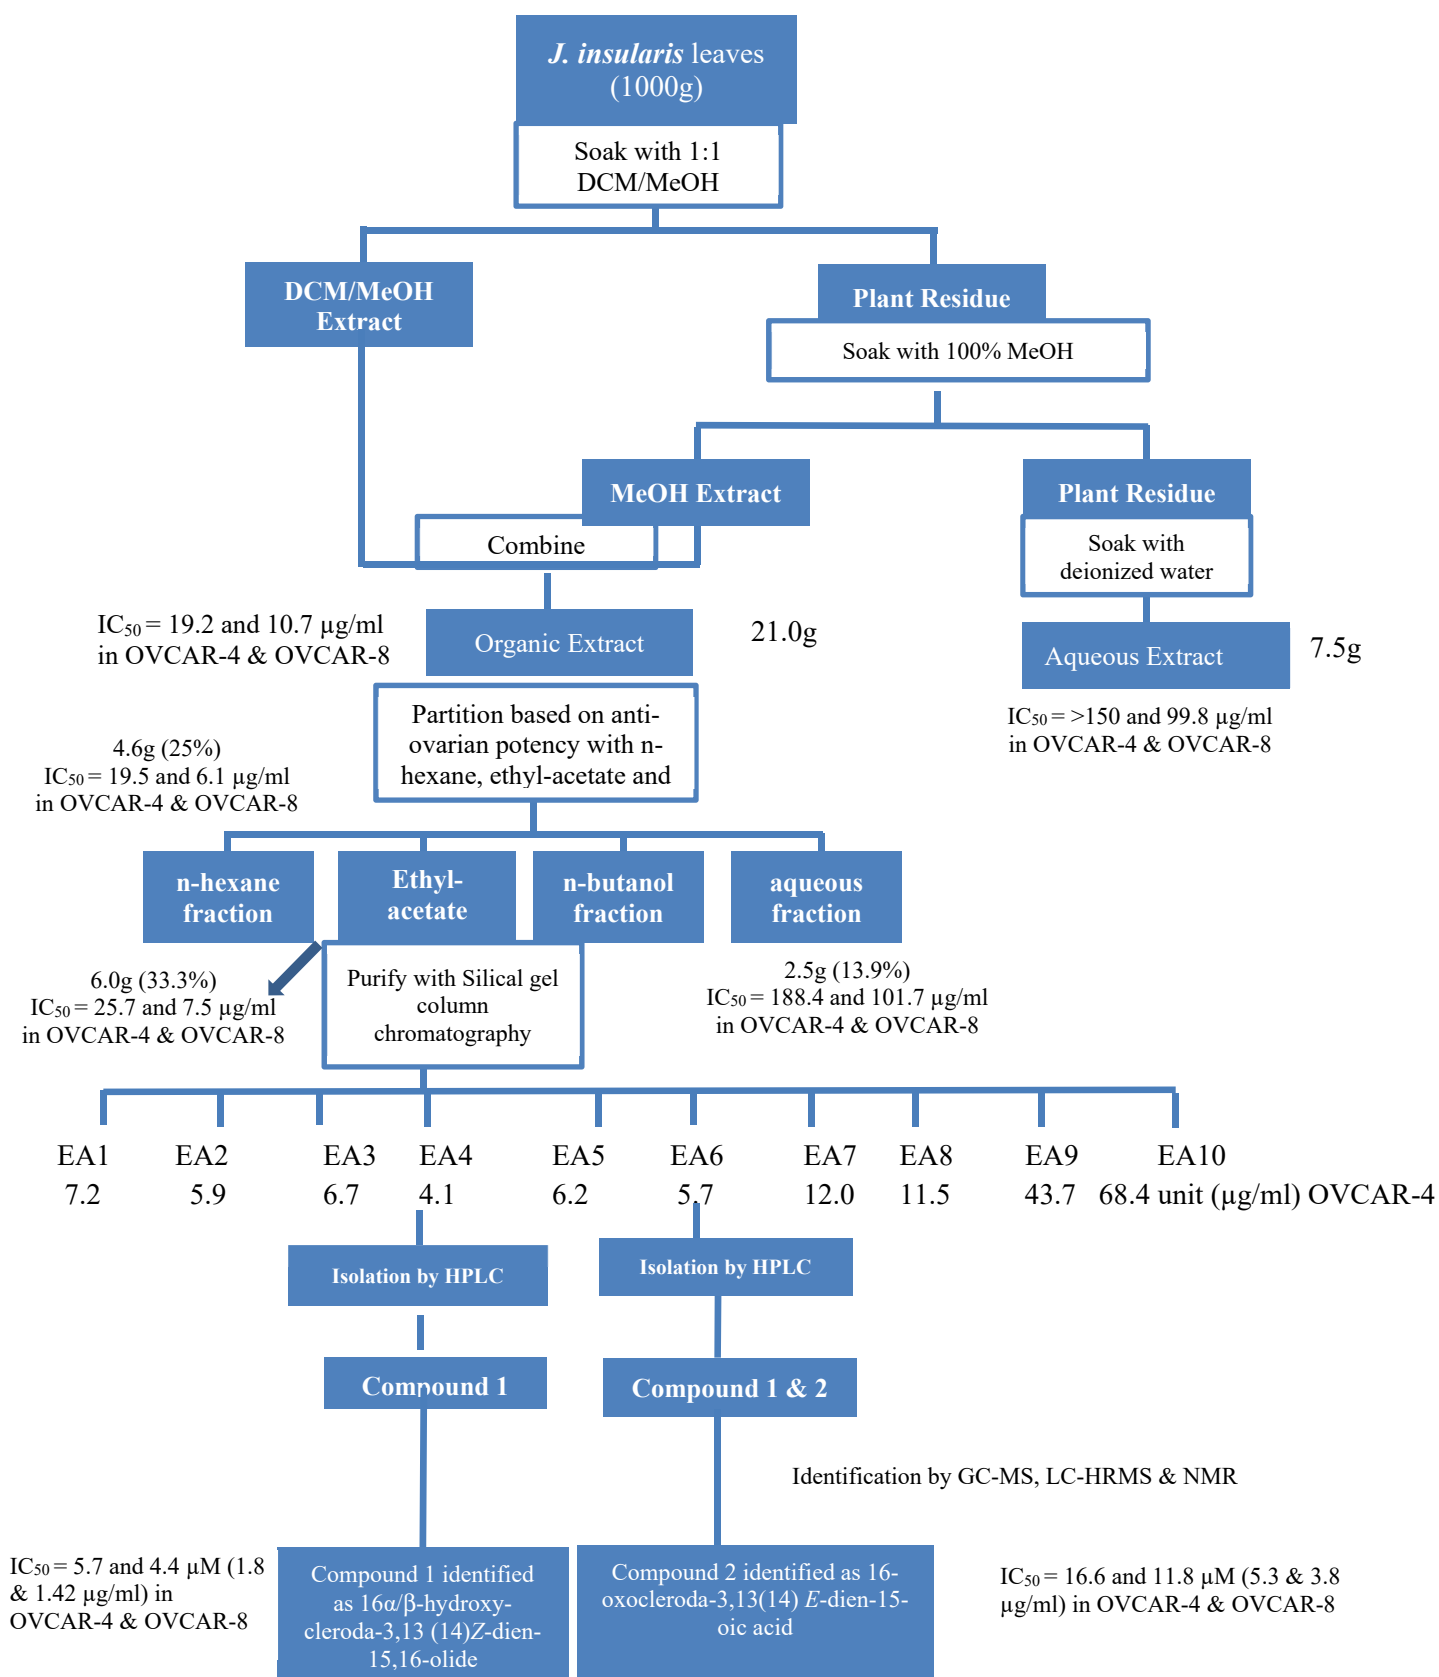

**Figure S1.** Scheme showing the extraction, bioassay-guided purification, and identification of cytotoxic compound **1** and **2** from *J. insularis*.

A)

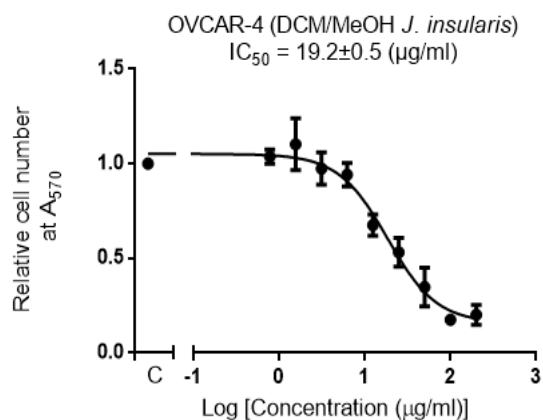

B)

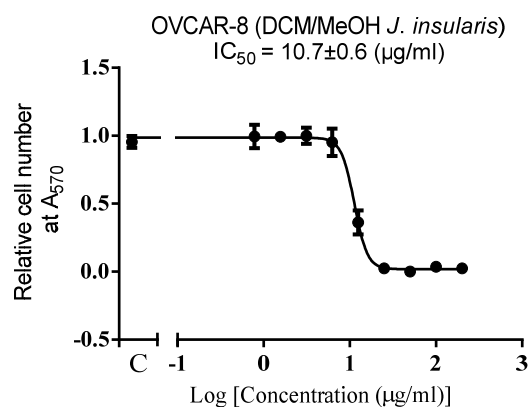

Figure S2: Mean concentration-response curve of the active extract of *J. insularis* (DCM/MeOH) in OVCAR 4 (A) and OVCAR 8 (B) ovarian cancer cell lines, showing potent cytotoxic activity of the organic extracts.

A)

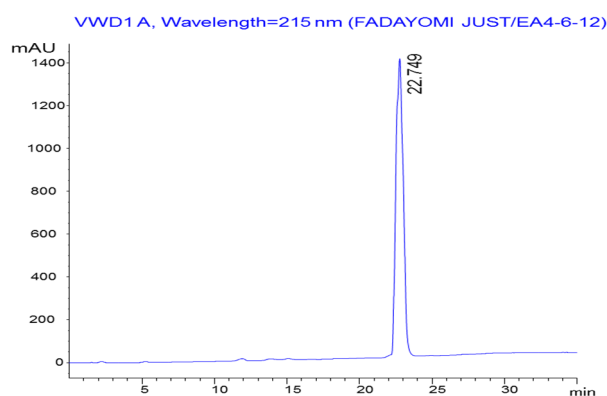

B)

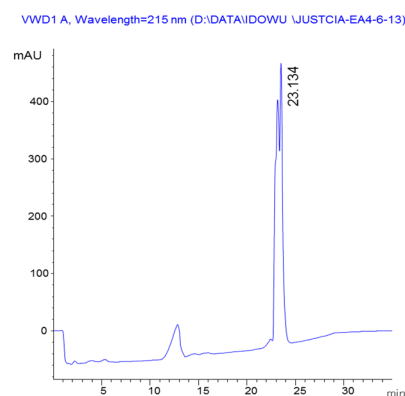

**Figure S3.** Analytical HPLC chromatograms of purified active compounds of *J. insularis*. (A) Compound 1 has a single peak at retention time 22.749 min indicating a purity of 97% and (B) compound 2 shows a major peak at retention time 23.134 min (purity 85%) and presence of a minor peak.

**A)**

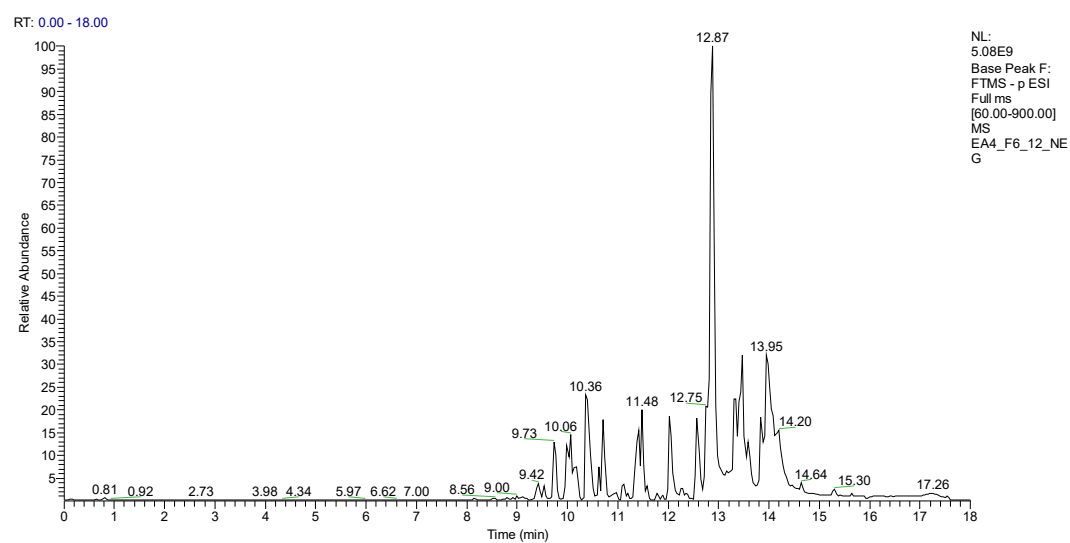

**B)**

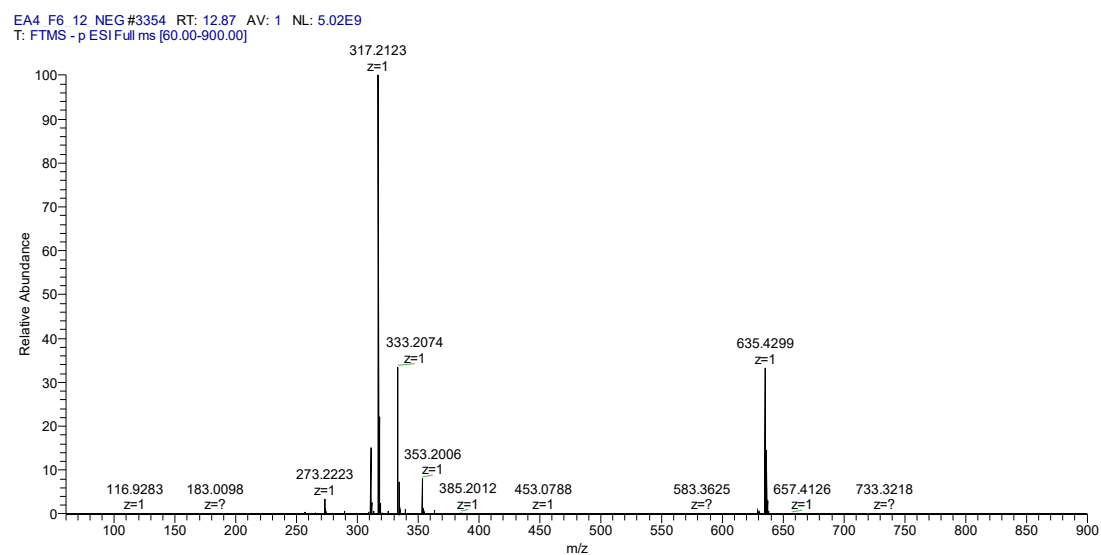

**Figure S4:** LC-HRMS chromatogram (A) and negative ESI-MS spectrum (B) of isolated compound **1** showing the HRMS of the major peak at a retention time of 12.87 min. The found high resolution mass of  $m/z$  at 317.2123  $[M-H]^-$  was consistent with its theoretical masses of 317.2117.

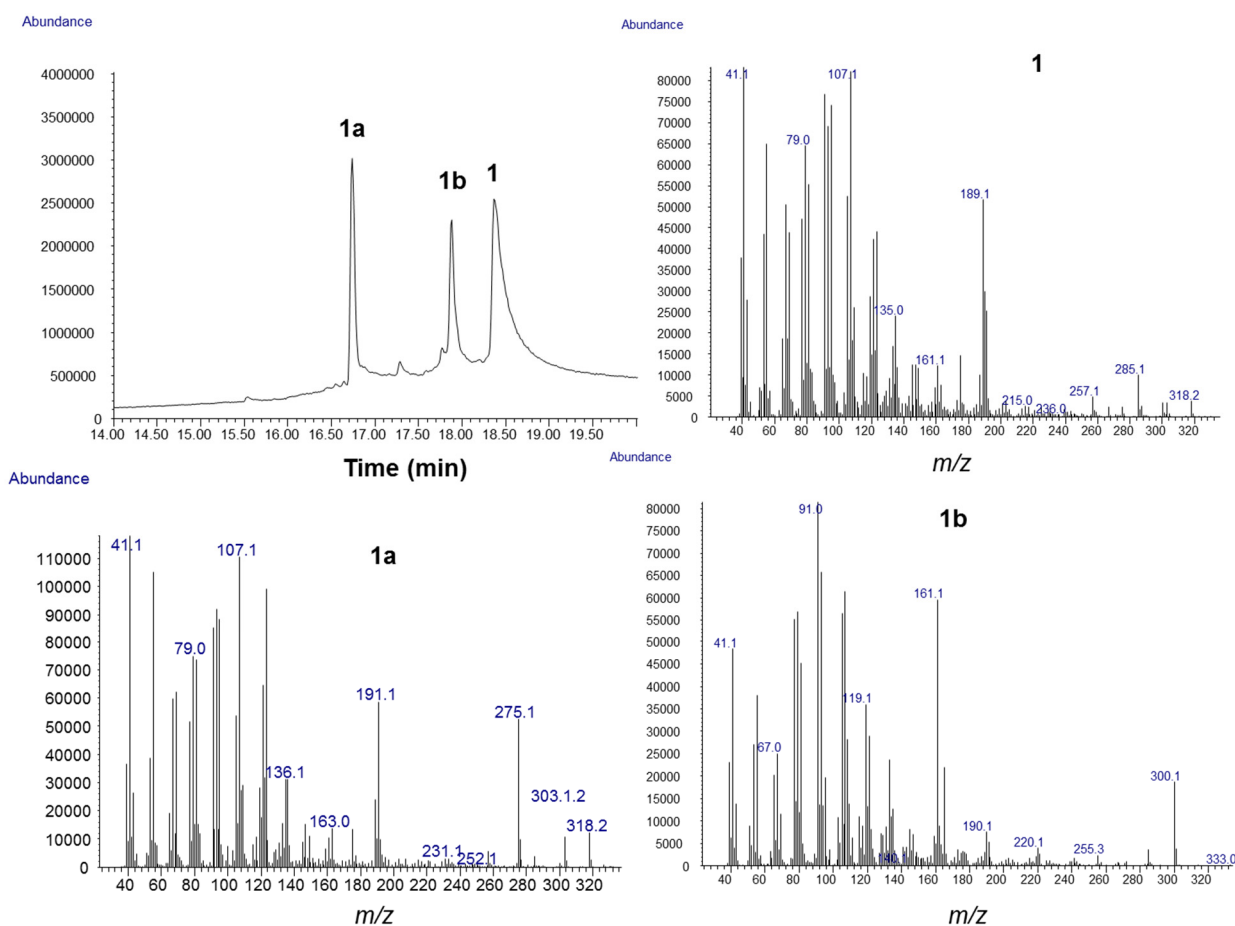

**Figure S5:** GC-MS chromatogram and mass spectra of the isolated compound **1** at Rt 18.45 min and two thermal degradation products of **1a** and **1b** under high temperature in the oven of GC-MS. Compound **1a** shows similar fragmentation ions as those of **1** but with an intensive ion  $m/z$  at 285.1 instead of 275.1 for **1**. Compound **1** and **1a** are unlikely their isomers due to the presence of this significant different fragmentation ion. Compound **1b** shows a molecule ion  $m/z$  at 300 due to loss of a water molecule instead of an ion at 318.2 for **1**.

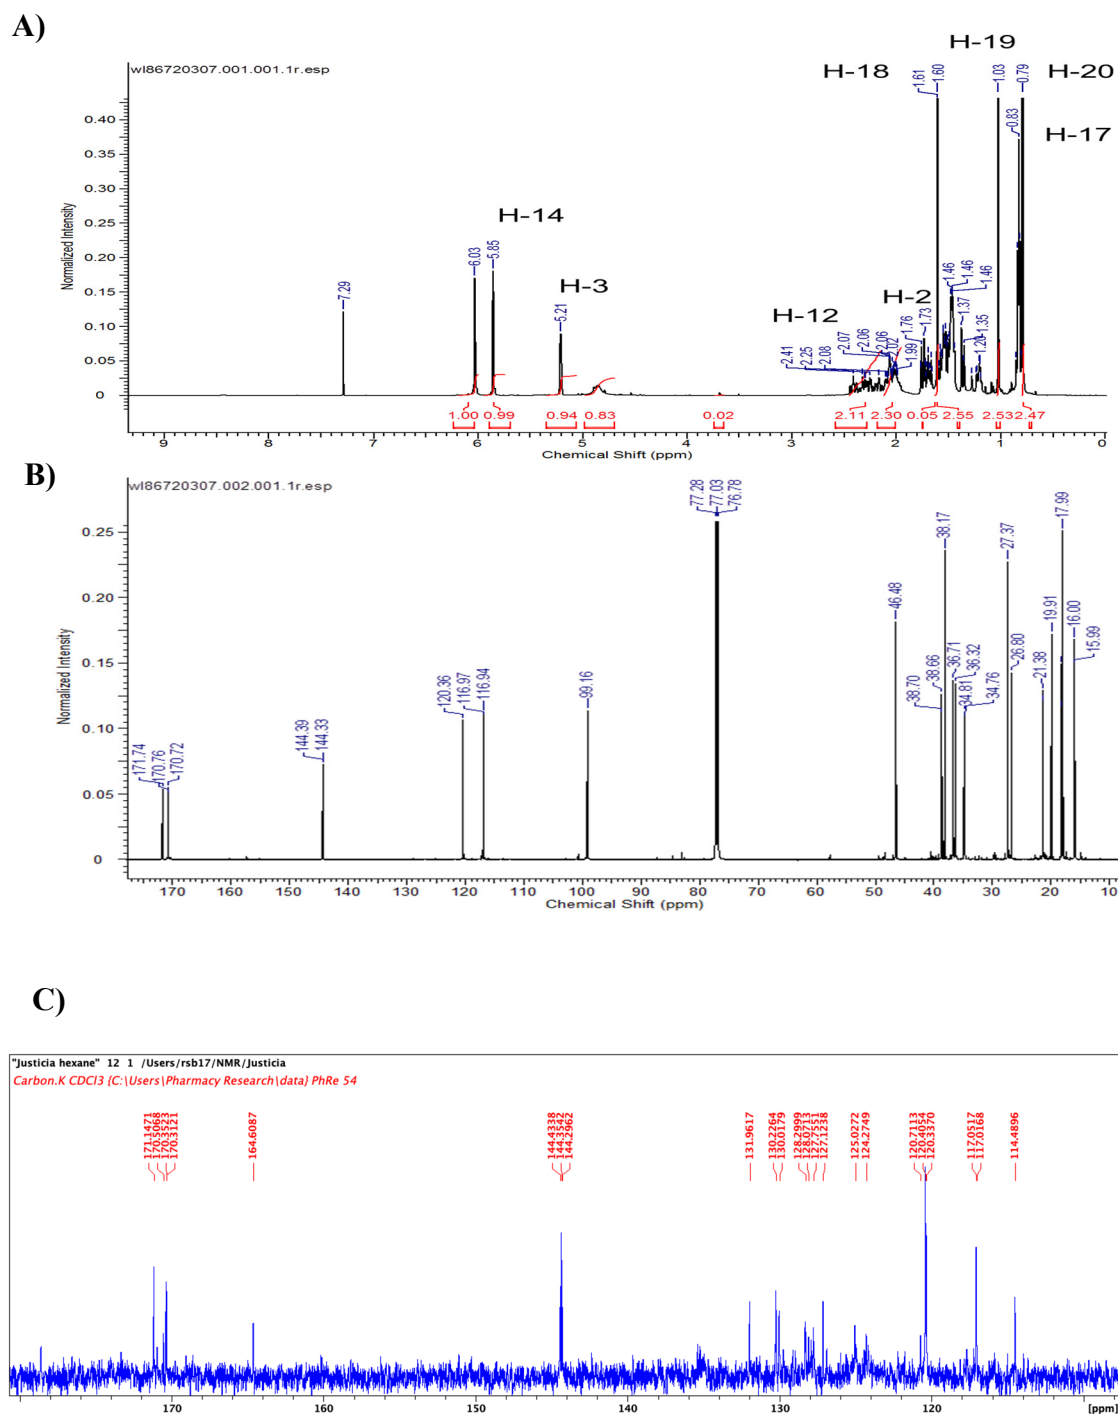

Figure S6: NMR data analysis of *Justicia insularis* of the purified compound **1** and hexane fraction in  $\text{CDCl}_3$ : (A)  $^1\text{H}$ -NMR (500 MHz), (B)  $^{13}\text{C}$ -NMR (125 MHz) spectrum, (C)  $^{13}\text{C}$ -NMR (100 MHz) spectrum (range of 110-180 ppm) of hexane fraction containing **1** before silica gel chromatography and HPLC. The assignment of each peak is indicated in Table S3. The ratio of the  $16\alpha$  and  $16\beta$  form of compound **1** is determined to be 1:1 by calculating the ratio of the integration value of the carbon peak at 116.94 ppm (C-14,  $16\alpha$  form) to that of the peak at 116.97 ppm (C-14,  $16\beta$  form). The epimers of compound **1** were present in the hexane fraction before purification process which may cause isomerisation, so epimers of compound **1** are natural products in *J. insularis*.

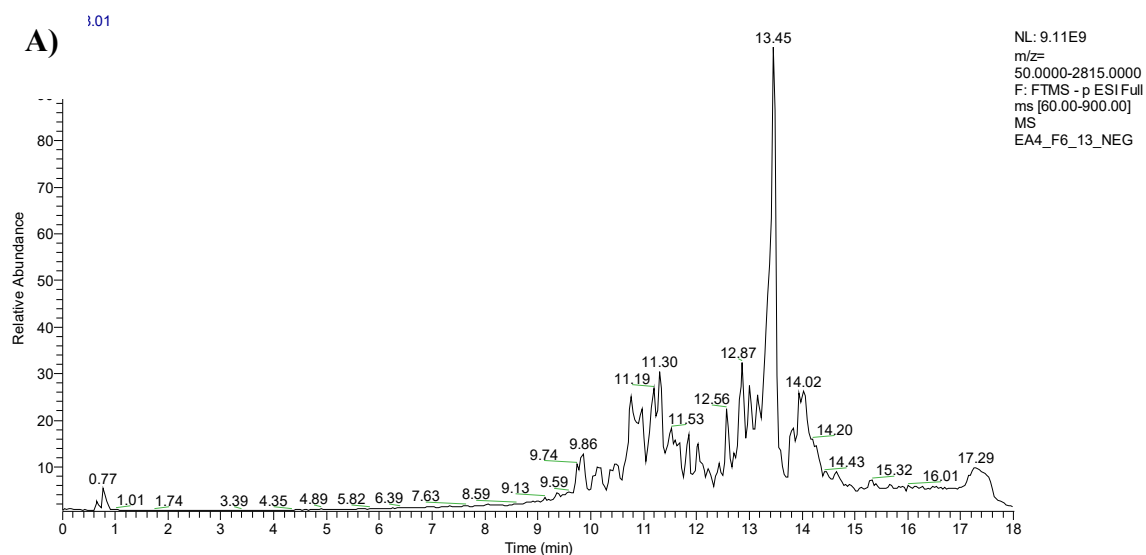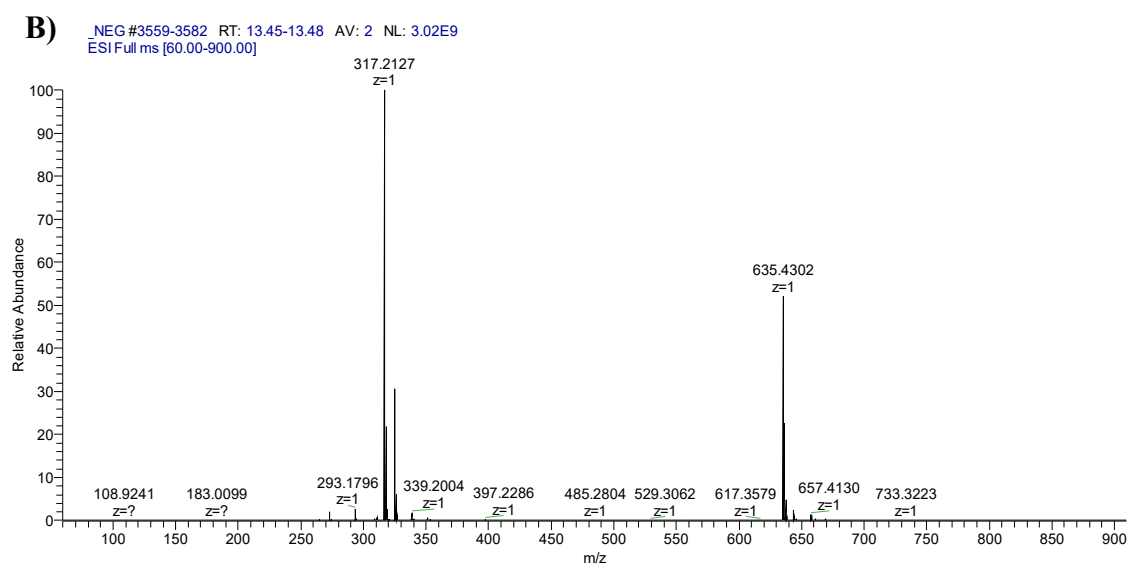

Figure S7: LC-MS chromatogram (**A**) and negative ESI-MS spectrum (**B**) of isolated compound 2 at retention time of 13.45 min. The found masses of  $m/z$  at 317.2127 $[M-H]^-$ , and 635.4302  $[2M-H]^-$  were consistent with their theoretical masses of 317.2117 and 635.4312, respectively.

A)

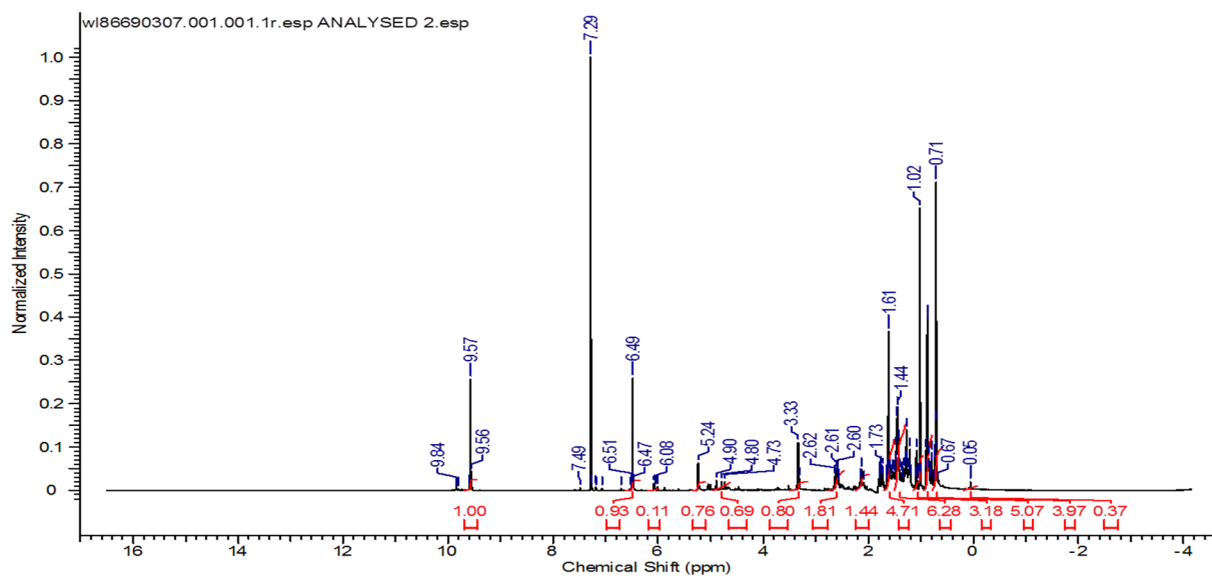

B)

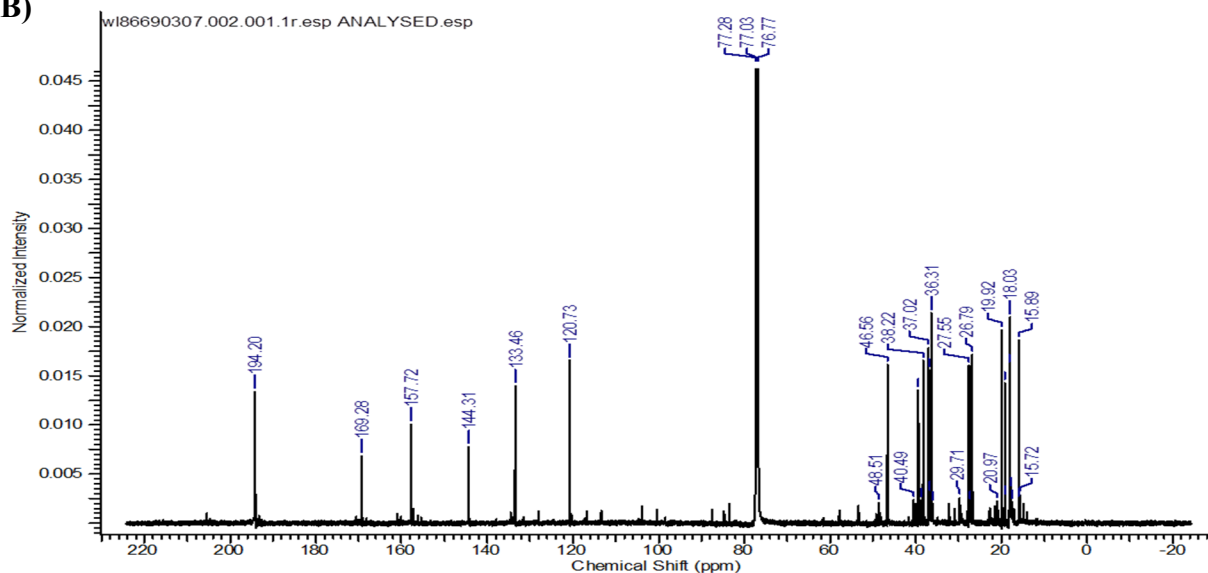

Figure S8: NMR data analysis of *Justicia insularis* purified compound 2 in CDCl<sub>3</sub>: (A) <sup>1</sup>H-NMR and (B) <sup>13</sup>C-NMR. The assignment of each peak is indicated in Table S3.



Table S1: The results of the growth inhibitory activities of *J. insularis* extracts and fractions on ovarian cancer OVCAR-4 and OVCAR-8 cell lines.

| Extracts, Fractions and Pure compounds | Abbrev.          | IC <sub>50</sub> on OVCAR-4 (µg/mL) | IC <sub>50</sub> on OVCAR-8 (µg/mL) |
|----------------------------------------|------------------|-------------------------------------|-------------------------------------|
| Dichloromethane /methanol Extract      | DCM/MeOH         | 19.2±0.5                            | 10.7±0.6                            |
| Aqueous Extract                        | Aq Ext           | > 150.0                             | 99.8±0.3                            |
| <i>n</i> -Hexane                       | <i>n</i> -Hex II | 19.5±1.0                            | 6.1±1.8                             |
| Ethyl acetate                          | EA               | 25.7±1.5                            | 7.5±1.7                             |
| <i>n</i> -Butanol                      | <i>n</i> -But    | 188.4±4.6                           | 101.7±2.2                           |
| Aqueous fraction                       | Aq               | 80.0±0.8                            | 71.5±14.9                           |

Table S2: The growth inhibitory activities of EA fractions and EA4 sub-fractions of *J. insularis* on OVCAR-4 ovarian cancer cell line.

| Ethyl acetate fractions of <i>J. insularis</i> | IC <sub>50</sub> value (µg/mL) on OVCAR-4 cell line | EA4 Sub-fractions of <i>J. insularis</i> | IC <sub>50</sub> value (µg/mL) on OVCAR-4 Cell line |
|------------------------------------------------|-----------------------------------------------------|------------------------------------------|-----------------------------------------------------|
| EA1                                            | 7.2±0.8                                             | EA4-1                                    | 6.8±1.0                                             |
| EA2                                            | 5.9±0.1                                             | EA4-2                                    | 9.1±2.6                                             |
| EA3                                            | 6.7±0.1                                             | EA4-3                                    | 5.3±1.1                                             |
| ➡ EA4                                          | 4.1±0.4                                             | ➡ EA4-4                                  | 3.0±0.4                                             |
| EA5                                            | 6.2±0.4                                             | EA4-5                                    | 9.4±0.5                                             |
| EA6                                            | 5.7±0.8                                             | ➡ EA4-6                                  | 2.6±0.2                                             |
| EA7                                            | 12.0±0.3                                            | EA4-7                                    | 10.3±2.4                                            |
| EA8                                            | 11.5±0.3                                            | EA4-8                                    | 4.8±0.9                                             |
| EA9                                            | 43.7±1.4                                            | EA4-9                                    | 5.8±0.9                                             |
| EA10                                           | 68.4±3.3                                            | EA4-10                                   | 7.2±0.8                                             |
|                                                |                                                     | EA4-11                                   | 14.2±2.3                                            |

Table S3: <sup>1</sup>H (500 MHz) and <sup>13</sup>C-NMR (125 MHz) assignments of isolated compound 1 and 2 (CDCl<sub>3</sub>).

| <sup>1</sup> H-NMR |                                                                                                                                                                             |                                                                            | <sup>13</sup> C-NMR |                   |       |
|--------------------|-----------------------------------------------------------------------------------------------------------------------------------------------------------------------------|----------------------------------------------------------------------------|---------------------|-------------------|-------|
| H                  | 1(16α + 16β)                                                                                                                                                                | 2                                                                          | C                   | 1(16α + 16β)      | 2     |
| 1                  | 1.48-1.55 (overlapped, m, 2H)                                                                                                                                               | 1.79 (dt, 12.8, 3.3Hz 1H);<br>1.46 (overlapped, 1H)                        | 1                   | 18.0              | 18.1  |
| 2                  | 2.03 (overlapped, 2H)                                                                                                                                                       | 2.10 (m, 2H)                                                               | 2                   | 26.79, 26.80      | 26.8  |
| 3                  | 5.21 (brs, 1H)                                                                                                                                                              | 5.24 (brs, 1H)                                                             | 3                   | 120.36,<br>120.43 | 120.7 |
|                    |                                                                                                                                                                             |                                                                            | 4                   | 144.33,<br>144.39 | 144.3 |
|                    |                                                                                                                                                                             |                                                                            | 5                   | 38.2              | 38.2  |
| 6                  | 1.20 (td, 13.0, 4.5 Hz, 1H), 1.73<br>(td, 13.0, 5.0 Hz, 1H)                                                                                                                 | 1.22 (m, 1H), 1.74 (td, 12.5,<br>3.5 Hz, 1H)                               | 6                   | 36.7              | 36.8  |
| 7                  | 1.46 (overlapped, 2H)                                                                                                                                                       | 1.50 (overlapped, 2H)                                                      | 7                   | 27.37             | 27.6  |
| 8                  | 1.47 (m, 1H)                                                                                                                                                                | 1.62 (overlapped, 1H)                                                      | 8                   | 36.36, 36.32      | 36.3  |
|                    |                                                                                                                                                                             |                                                                            | 9                   | 38.66, 38.70      | 39.4  |
| 10                 | 1.35 (dd, 12, 2.0 Hz, 1H)                                                                                                                                                   | 1.43 (overlapped, 1H)                                                      | 10                  | 46.5              | 46.6  |
| 11                 | 1.73 (dd, 14.2, 3.3 Hz, 1H); 1.68<br>(ddd, 14.2, 9.1, 4.9 Hz, 1H)                                                                                                           | 1.21, 1.30 (overlapped, 2H)                                                | 11                  | 34.8              | 37.0  |
| 12                 | 16α form: 2.40 (ddd, 14.2, 5.0,<br>1.4 Hz, H), 2.25 (ddd, 14.2, 4.3,<br>1.4 Hz, 1H)<br>16β form: 2.32 (ddd, 14.1, 5.0,<br>1.3 Hz, 1H); 2.15 (ddd, 14.1,<br>4.7, 1.7 Hz, 1H) | 2.57 (ddd, 11.0, 5.2, 1.6 Hz,<br>1H); 2.30 (ddd, 11.0, 4.4, 3.7<br>Hz, 1H) | 12                  | 21.35, 21.38      | 19.2  |
|                    |                                                                                                                                                                             |                                                                            | 13                  | 170.72,<br>170.76 | 157.7 |
| 14                 | 5.85 (s, 1H)                                                                                                                                                                | 6.49 (s, 1H)                                                               | 14                  | 116.94,<br>116.97 | 133.5 |
|                    |                                                                                                                                                                             |                                                                            | 15                  | 171.7             | 169.3 |
| 16                 | 6.03 (brs, 1H)                                                                                                                                                              | 9.57 (s, 1H)                                                               | 16                  | 99.14, 99.16      | 194.3 |
| 17                 | 16α form: 0.83 (d, 5.5 Hz, 3H);<br>16β form: 0.82 (d, 5.8 Hz, 3H)                                                                                                           | 0.87 (d, 7.3 Hz, 3H)                                                       | 17                  | 16.00             | 15.9  |
| 18                 | 16α form: 1.61 (d, 3H);<br>16β form: 1.60 (s, 3H)                                                                                                                           | 1.61 (s, 3H)                                                               | 18                  | 18.23             | 18.0  |
| 19                 | 1.03 (s, 3H)                                                                                                                                                                | 1.02 (s, 3H)                                                               | 19                  | 19.9              | 19.9  |
| 20                 | 0.79 (s, 3H)                                                                                                                                                                | 0.71 (s, 3H)                                                               | 20                  | 18.2              | 18.1  |

Table S4. Molecular descriptors and drug-likeness of compounds 1 and 2 in *J. insularis* calculated by SwissADME web tool.

| Compound | Formula                                        | Molecular weight | Num. rotatable bonds | Num. H-bond acceptors | Num. H-bond donors | Molar Refractivity | Topological Polar Surface Area (TPSA) | Log Po/w (iLOGP) | Drug-likeness (Lipinski rule) |
|----------|------------------------------------------------|------------------|----------------------|-----------------------|--------------------|--------------------|---------------------------------------|------------------|-------------------------------|
| <b>1</b> | C <sub>20</sub> H <sub>30</sub> O <sub>3</sub> | 318.45 g/mol     | 3                    | 3                     | 1                  | 92.89              | 46.53 Å <sup>2</sup>                  | 3.10             | Yes                           |
| <b>2</b> | C <sub>20</sub> H <sub>30</sub> O <sub>3</sub> | 318.45 g/mol     | 5                    | 3                     | 1                  | 94.53              | 54.37 Å <sup>2</sup>                  | 2.79             | Yes                           |

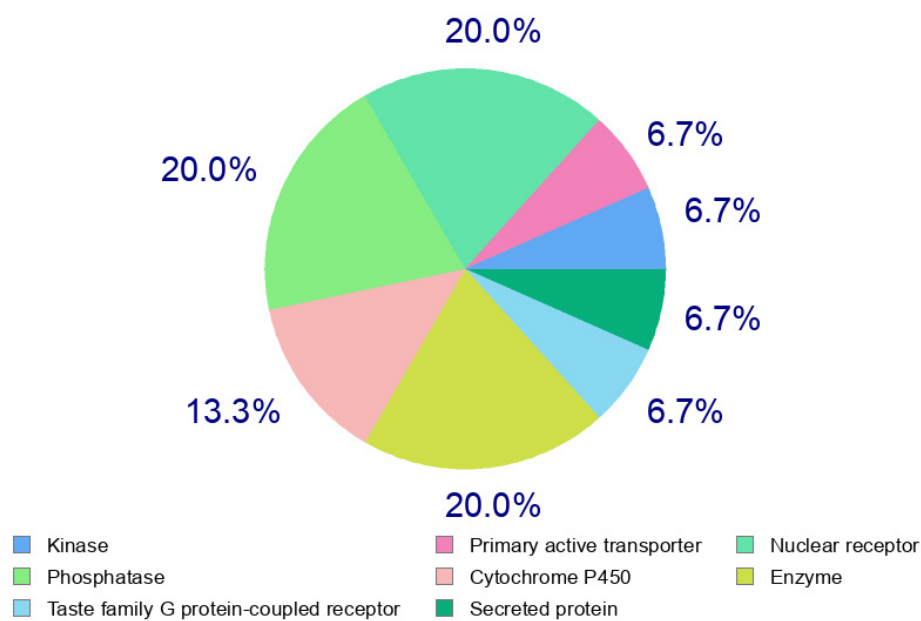

Figure S9 Distribution of predicted targets molecules of compound 1 by the SwissADME web tool (Table S5).

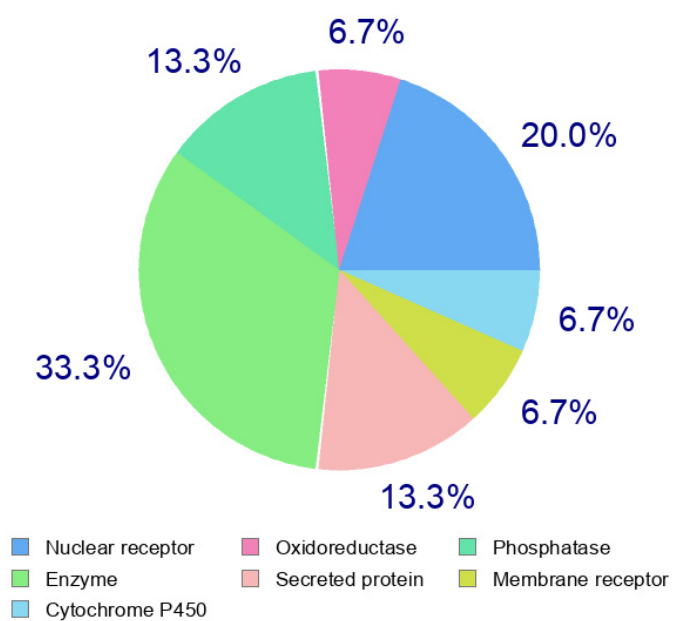

Figure S10. Distribution of predicted targets molecules of compound 2 by the SwissADME web tool (Table S6).

Table S5. Predicted protein targets of compound 1 by SwissTargetPrediction web tool (<http://www.swisstargetprediction.ch>).

| Target                                      | Common name | Uniprot ID | ChEMBL ID      | Target Class               | Probability* | Known actives (3D/2D) |
|---------------------------------------------|-------------|------------|----------------|----------------------------|--------------|-----------------------|
| Ribosomal protein S6 kinase alpha 5         | RPS6K A5    | O755 82    | CHEMBL 4237    | Kinase                     | 0.13         | 2 / 4                 |
| Potassium-transporting ATPase alpha chain 2 | ATP12 A     | P547 07    | CHEMBL 2933    | Primary active transporter | 0.11         | 0 / 9                 |
| Androgen Receptor                           | AR          | P102 75    | CHEMBL 1871    | Nuclear receptor           | 0.10         | 140 / 64              |
| Dual specificity phosphatase Cdc25A         | CDC25 A     | P303 04    | CHEMBL 3775    | Phosphatase                | 0.10         | 4 / 15                |
| Progesterone receptor                       | PGR         | P064 01    | CHEMBL 208     | Nuclear receptor           | 0.10         | 121 / 41              |
| Cytochrome P450 19A1                        | CYP19 A1    | P115 11    | CHEMBL 1978    | Cytochrome P450            | 0.10         | 224 / 73              |
| Dual specificity phosphatase Cdc25B         | CDC25 B     | P303 05    | CHEMBL 4804    | Phosphatase                | 0.10         | 4 / 12                |
| Phospholipase A2 group 1B                   | PLA2G 1B    | P040 54    | CHEMBL 4426    | Enzyme<br>Taste family G   | 0.10         | 0 / 4                 |
| Taste receptor type 2 member 31             | TAS2R 31    | P595 38    | CHEMBL 2034804 | protein-coupled receptor   | 0.10         | 0 / 1                 |
| Glucocorticoid receptor                     | NR3C1       | P041 50    | CHEMBL 2034    | Nuclear receptor           | 0.10         | 80 / 12               |
| Testis-specific androgen-binding protein    | SHBG        | P042 78    | CHEMBL 3305    | Secreted protein           | 0.10         | 46 / 17               |
| Dual specificity phosphatase Cdc25C         | CDC25 C     | P303 07    | CHEMBL 2378    | Phosphatase                | 0.10         | 0 / 4                 |
| 11-beta-hydroxysteroid dehydrogenase 2      | HSD11 B2    | P803 65    | CHEMBL 3746    | Enzyme                     | 0.10         | 0 / 12                |
| Cytochrome P450 2C19                        | CYP2C 19    | P332 61    | CHEMBL 3622    | Cytochrome P450            | 0.10         | 10 / 3                |
| 11-beta-hydroxysteroid dehydrogenase 1      | HSD11 B1    | P288 45    | CHEMBL 4235    | Enzyme                     | 0.10         | 126 / 22              |

Table 6. Predicted protein targets of compound 2 by SwissTargetPrediction web tool (<http://www.swisstargetprediction.ch>).

| Target                                         | Common name | Uniprot ID    | ChEMBL ID   | Target Class      | Probability * | Known actives (3D/2D) |
|------------------------------------------------|-------------|---------------|-------------|-------------------|---------------|-----------------------|
| Estrogen receptor beta                         | ESR2        | Q92731        | CHEMBL242   | Nuclear receptor  | 0.24          | 3 / 15                |
| Steroid 5-alpha-reductase 2                    | SRD5A2      | P31213        | CHEMBL1856  | Oxidoreductase    | 0.20          | 22 / 35               |
| Estrogen receptor alpha                        | ESR1        | P03372        | CHEMBL206   | Nuclear receptor  | 0.13          | 6 / 14                |
| T-cell protein-tyrosine phosphatase            | PTPN2       | P17706        | CHEMBL3807  | Phosphatase       | 0.10          | 2 / 17                |
| Protein-tyrosine phosphatase 1B                | PTPN1       | P18031        | CHEMBL35    | Phosphatase       | 0.10          | 9 / 50                |
| 11-beta-hydroxysteroid dehydrogenase 1         | HSD11B1     | P28845        | CHEMBL235   | Enzyme            | 0.10          | 52 / 32               |
| Nitric oxide synthase, inducible (by homology) | NOS2        | P35228        | CHEMBL481   | Enzyme            | 0.10          | 2 / 20                |
| Protein farnesyltransferase                    | FNTA FNTB   | P49354 P49356 | CHEMBL09410 | Enzyme            | 0.10          | 21 / 7                |
| Prostaglandin E synthase                       | PTGES       | O14684        | CHEMBL658   | Enzyme            | 0.10          | 25 / 13               |
| DNA polymerase beta (by homology)              | POLB        | P06746        | CHEMBL392   | Enzyme            | 0.10          | 0 / 9                 |
| Corticosteroid binding globulin                | SERPINA6    | P08185        | CHEMBL421   | Secreted protein  | 0.10          | 0 / 20                |
| Sigma opioid receptor                          | SIGMAR1     | Q99720        | CHEMBL87    | Membrane receptor | 0.10          | 0 / 3                 |
| Testis-specific androgen-binding protein       | SHBG        | P04278        | CHEMBL305   | Secreted protein  | 0.10          | 0 / 40                |
| Pregnane X receptor                            | NR1I2       | O75469        | CHEMBL401   | Nuclear receptor  | 0.10          | 0 / 3                 |
| Cytochrome P450 17A1                           | CYP17A1     | P05093        | CHEMBL522   | Cytochrome P450   | 0.10          | 0 / 24                |
| Protein kinase C eta                           | PRKCH       | P24723        | CHEMBL616   | Kinase            | 0.10          | 0 / 1                 |
| Estradiol 17-beta-dehydrogenase 3              | HSD17B3     | P37058        | CHEMBL234   | Enzyme            | 0.10          | 0 / 1                 |

|                                                                  |          |        |              |                                                 |      |         |
|------------------------------------------------------------------|----------|--------|--------------|-------------------------------------------------|------|---------|
| Nuclear receptor subfamily 1 group I member 3 (by homology)      | NR1I3    | Q14994 | CHE MBL5 503 | Nuclear receptor                                | 0.10 | 0 / 2   |
| Dual specificity phosphatase Cdc25A                              | CDC25A   | P30304 | CHE MBL3 775 | Phosphatase                                     | 0.10 | 5 / 13  |
| Dual specificity phosphatase Cdc25B                              | CDC25B   | P30305 | CHE MBL4 804 | Phosphatase Family A G protein-coupled receptor | 0.10 | 2 / 6   |
| Leukotriene B4 receptor 1                                        | LTB4R    | Q15722 | CHE MBL3 911 | Oxidoreductase                                  | 0.10 | 17 / 6  |
| Steroid 5-alpha-reductase 1                                      | SRD5A1   | P18405 | CHE MBL1 787 | Enzyme                                          | 0.10 | 7 / 8   |
| UDP-glucuronosyltransferase 2B7                                  | UGT2B7   | P16662 | CHE MBL4 370 | Other membrane protein                          | 0.10 | 4 / 4   |
| Niemann-Pick C1-like protein 1                                   | NPC1L1   | Q9UHC9 | CHE MBL2 027 | Electrochemical transporter                     | 0.10 | 0 / 8   |
| Solute carrier family 22 member 12                               | SLC22A12 | Q96S37 | CHE MBL6 120 |                                                 | 0.10 | 59 / 0  |
| Aldo-keto reductase family 1 member B10                          | AKR1B10  | O60218 | CHE MBL5 983 | Fatty acid binding protein family               | 0.10 | 13 / 6  |
| Fatty acid-binding protein, liver (by homology)                  | FABP1    | P07148 | CHE MBL5 421 | Cytochrome P450                                 | 0.10 | 1 / 3   |
| Cytochrome P450 19A1                                             | CYP19A1  | P11511 | CHE MBL1 978 | Voltage-gated ion channel                       | 0.10 | 1 / 297 |
| Transient receptor potential cation channel subfamily A member 1 | TRPA1    | O75762 | CHE MBL6 007 | Family A G protein-coupled receptor             | 0.10 | 1 / 2   |
| Type-1 angiotensin II receptor                                   | AGTR1    | P30556 | CHE MBL2 27  | Family A G protein-coupled receptor             | 0.10 | 47 / 0  |
| G protein-coupled receptor 44                                    | PTGDR2   | Q9Y5Y4 | CHE MBL5 071 |                                                 | 0.10 | 632 / 0 |
| Thromboxane-A synthase                                           | TBXAS1   | P24557 | CHE MBL1 835 | Cytochrome P450                                 | 0.10 | 150 / 0 |
| Progesterone receptor                                            | PGR      | P06401 | CHE MBL2 08  | Nuclear receptor                                | 0.10 | 5 / 50  |
| 11-beta-hydroxysteroid dehydrogenase 2                           | HSD11B2  | P80365 | CHE MBL3 746 | Enzyme                                          | 0.10 | 5 / 21  |
| MAP kinase ERK1                                                  | MAPK3    | P27361 | CHE MBL3 385 | Kinase                                          | 0.10 | 0 / 1   |

|                                                  |                                            |                                                 |                           |                                                                              |      |          |
|--------------------------------------------------|--------------------------------------------|-------------------------------------------------|---------------------------|------------------------------------------------------------------------------|------|----------|
| Arachidonate 5-lipoxygenase                      | ALOX5                                      | P09917                                          | CHE<br>MBL2<br>15         | Oxidoreductase                                                               | 0.10 | 31 / 21  |
| Gamma-secretase                                  | PSEN2 PSENEN<br>NCSTN APH1A<br>PSEN1 APH1B | P49810 Q9NZ42<br>Q92542 Q96BI3<br>P49768 Q8WW43 | CHE<br>MBL2<br>09413<br>5 | Protease<br>Fatty acid binding protein family<br>Electrochemical transporter | 0.10 | 7 / 0    |
| Fatty acid binding protein adipocyte             | FABP4                                      | P15090                                          | CHE<br>MBL2<br>083        |                                                                              | 0.10 | 45 / 3   |
| Monocarboxylate transporter 1 (by homology)      | SLC16A1                                    | P53985                                          | CHE<br>MBL4<br>360        |                                                                              | 0.10 | 19 / 0   |
| Carbonic anhydrase II                            | CA2                                        | P00918                                          | CHE<br>MBL2<br>05         | Lyase                                                                        | 0.10 | 11 / 0   |
| Carbonic anhydrase XII                           | CA12                                       | O43570                                          | CHE<br>MBL3<br>242        | Lyase                                                                        | 0.10 | 7 / 0    |
| Carbonic anhydrase IX                            | CA9                                        | Q16790                                          | CHE<br>MBL3<br>594        | Lyase                                                                        | 0.10 | 7 / 0    |
| Peroxisome proliferator-activated receptor gamma | PPARG                                      | P37231                                          | CHE<br>MBL2<br>35         | Nuclear receptor                                                             | 0.10 | 144 / 16 |
| Prostaglandin E synthase 2                       | PTGES2                                     | Q9H7Z7                                          | CHE<br>MBL4<br>411        | Enzyme                                                                       | 0.10 | 5 / 0    |
| TNF-alpha                                        | TNF                                        | P01375                                          | CHE<br>MBL1<br>825        | Secreted protein                                                             | 0.10 | 0 / 6    |
| Butyrylcholinesterase                            | BCHE                                       | P06276                                          | CHE<br>MBL1<br>914        | Hydrolase                                                                    | 0.10 | 0 / 2    |
| Beta-secretase 1                                 | BACE1                                      | P56817                                          | CHE<br>MBL4<br>822        | Protease                                                                     | 0.10 | 0 / 2    |
| Arachidonate 15-lipoxygenase                     | ALOX15                                     | P16050                                          | CHE<br>MBL2<br>903        | Enzyme                                                                       | 0.10 | 1 / 0    |
| Peroxisome proliferator-activated receptor alpha | PPARA                                      | Q07869                                          | CHE<br>MBL2<br>39         | Nuclear receptor                                                             | 0.10 | 94 / 11  |
| Glucocorticoid receptor                          | NR3C1                                      | P04150                                          | CHE<br>MBL2<br>034        | Nuclear receptor                                                             | 0.10 | 9 / 34   |
| Angiotensin-converting enzyme                    | ACE                                        | P12821                                          | CHE<br>MBL1<br>808        | Protease                                                                     | 0.10 | 181 / 0  |
| Neprilysin                                       | MME                                        | P08473                                          | CHE<br>MBL1<br>944        | Protease<br>Family A G protein-coupled receptor                              | 0.10 | 136 / 0  |
| Dopamine D2 receptor                             | DRD2                                       | P14416                                          | CHE<br>MBL2<br>17         |                                                                              | 0.10 | 1 / 0    |
| Peroxisome proliferator-activated receptor delta | PPARD                                      | Q03181                                          | CHE<br>MBL3<br>979        | Nuclear receptor                                                             | 0.10 | 28 / 9   |



|                                                                           |         |        |                           |                                               |      |            |
|---------------------------------------------------------------------------|---------|--------|---------------------------|-----------------------------------------------|------|------------|
| p53-binding protein<br>Mdm-2                                              | MDM2    | Q00987 | CHE<br>MBL5<br>023        | Other<br>nuclear<br>protein<br>Family A G     | 0.10 | 72 /<br>0  |
| C-C chemokine<br>receptor type 5                                          | CCR5    | P51681 | CHE<br>MBL2<br>74         | protein-<br>coupled<br>receptor<br>Family A G | 0.10 | 0 / 1      |
| Prostanoid EP1<br>receptor                                                | PTGER1  | P34995 | CHE<br>MBL1<br>811        | protein-<br>coupled<br>receptor               | 0.10 | 264 /<br>7 |
| Androgen Receptor                                                         | AR      | P10275 | CHE<br>MBL1<br>871        | Nuclear<br>receptor                           | 0.10 | 3 /<br>92  |
| Mineralocorticoid<br>receptor                                             | NR3C2   | P08235 | CHE<br>MBL1<br>994        | Nuclear<br>receptor                           | 0.10 | 2 /<br>26  |
| Transient receptor<br>potential cation<br>channel subfamily M<br>member 8 | TRPM8   | Q7Z2W7 | CHE<br>MBL1<br>07531<br>9 | Voltage-<br>gated ion<br>channel              | 0.10 | 24 /<br>0  |
| Cytochrome P450<br>26B1                                                   | CYP26B1 | Q9NR63 | CHE<br>MBL3<br>71368<br>7 | Cytochrome<br>P450<br>Family A G              | 0.10 | 7 / 0      |
| Oxoecosanoid<br>receptor 1                                                | OXER1   | Q8TDS5 | CHE<br>MBL1<br>62846<br>1 | protein-<br>coupled<br>receptor<br>Family A G | 0.10 | 4 / 0      |
| Angiotensin II receptor                                                   | AGTR2   | P50052 | CHE<br>MBL4<br>607        | protein-<br>coupled<br>receptor               | 0.10 | 4 / 0      |
| Carboxylesterase 2                                                        | CES2    | O00748 | CHE<br>MBL3<br>180        | Enzyme                                        | 0.10 | 0 /<br>14  |
| Prolyl endopeptidase                                                      | PREP    | P48147 | CHE<br>MBL3<br>202        | Protease                                      | 0.10 | 0 / 2      |
| Aldose reductase                                                          | AKR1B1  | P15121 | CHE<br>MBL1<br>900        | Enzyme                                        | 0.10 | 102 /<br>0 |
| Endothelin-converting<br>enzyme 1                                         | ECE1    | P42892 | CHE<br>MBL4<br>791        | Protease                                      | 0.10 | 32 /<br>0  |
| Chymase                                                                   | CMA1    | P23946 | CHE<br>MBL4<br>068        | Protease                                      | 0.10 | 43 /<br>0  |
| Cathepsin G                                                               | CTSG    | P08311 | CHE<br>MBL4<br>071        | Protease<br>Family A G                        | 0.10 | 8 / 0      |
| Endothelin receptor<br>ET-A (by homology)                                 | EDNRA   | P25101 | CHE<br>MBL2<br>52         | protein-<br>coupled<br>receptor               | 0.10 | 46 /<br>0  |
| Nuclear receptor ROR-<br>alpha                                            | RORA    | P35398 | CHE<br>MBL5<br>868        | Nuclear<br>receptor                           | 0.10 | 0 / 4      |

|                                         |       |        |                    |                                            |      |       |
|-----------------------------------------|-------|--------|--------------------|--------------------------------------------|------|-------|
| Fatty acid binding<br>protein epidermal | FABP5 | Q01469 | CHE<br>MBL3<br>674 | Fatty acid<br>binding<br>protein<br>family | 0.10 | 8 / 1 |
| Carbonic anhydrase I                    | CA1   | P00915 | CHE<br>MBL2<br>61  | Lyase                                      | 0.10 | 9 / 0 |

---
